# Supplementary material for: Notch3 marks clonogenic mammary luminal progenitor cells in vivo
Source: PubMed Central journal article supplement — J Cell Biol. 2013 Oct 14;203(1):47–56. doi: 10.1083/jcb.201307046 (PMC3798243; doi:10.1083/jcb.201307046), 2013-10-14
Supplement: supp_jcb.201307046_JCB_201307046_sm.pdf [file supp_jcb.201307046_JCB_201307046_sm.pdf]

Lafkas et al., <http://www.jcb.org/cgi/content/full/jcb.201307046/DC1>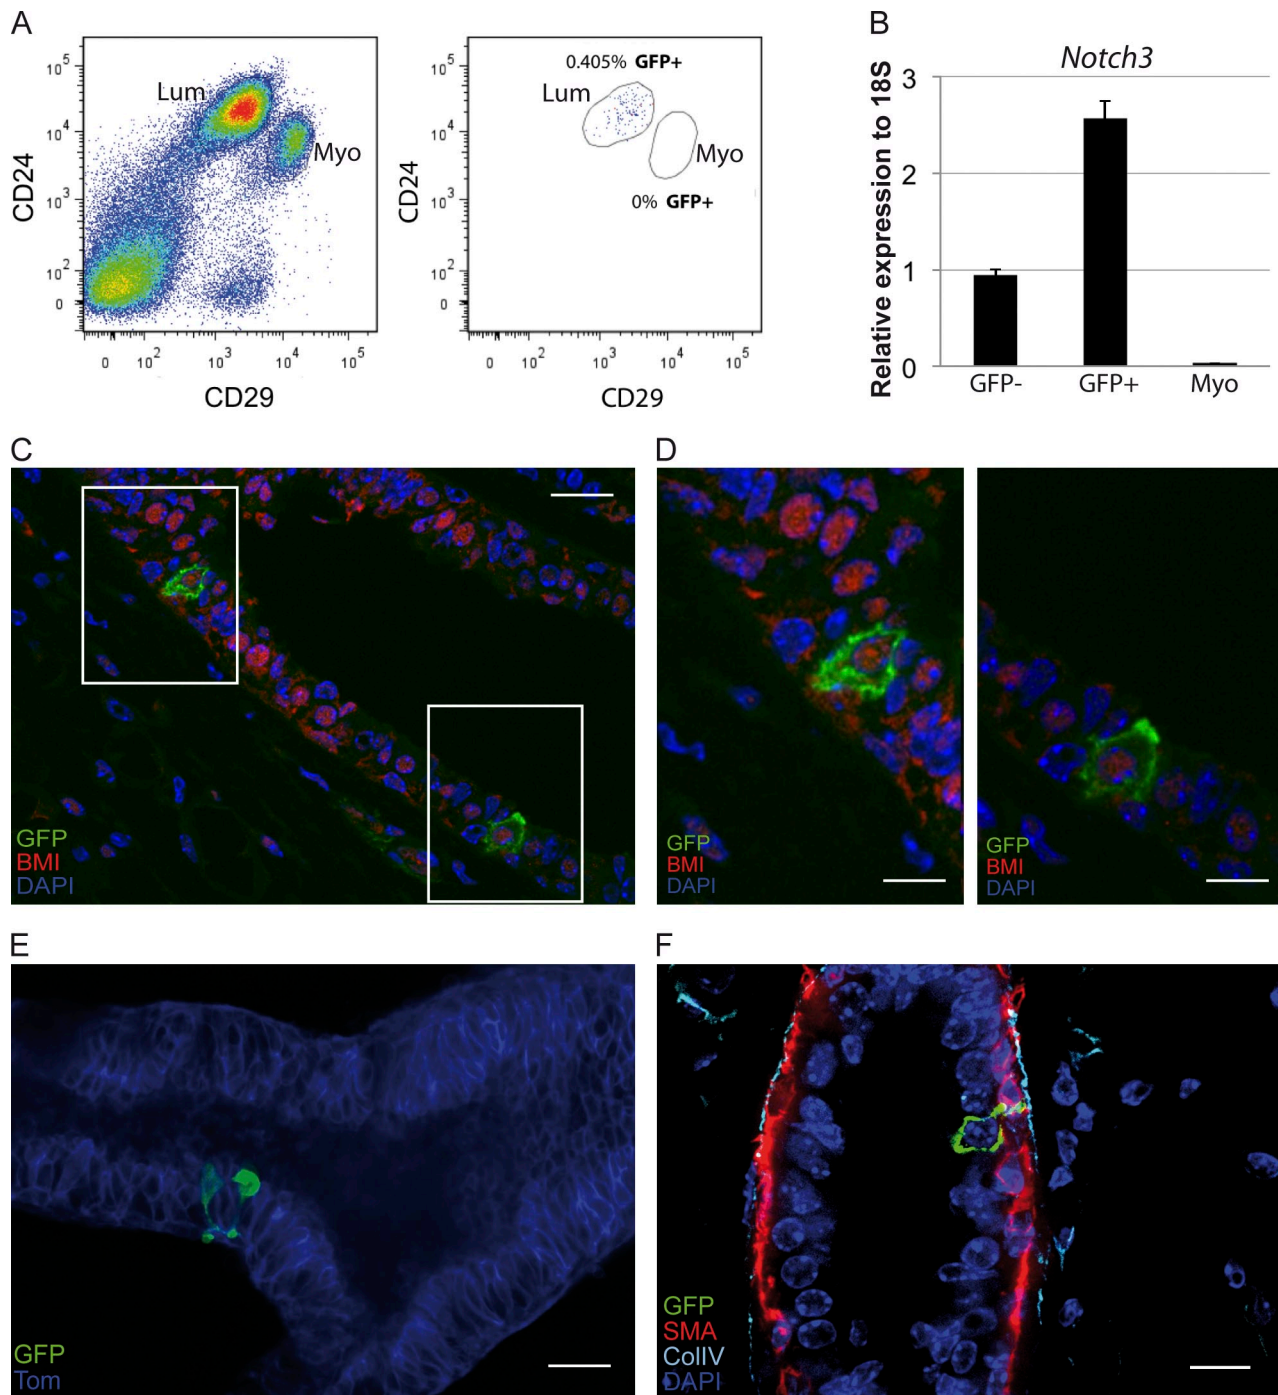

**Figure S1. Characterization of Notch3-expressing cells.** (A) A single-cell suspension from 6-wk-old Notch3-CreERT2<sup>SAT</sup>/R26<sup>mTmG</sup> mice 24 h after induction ( $n = 5$ ) was subjected to FACS analysis. CD29 and CD24 staining was used to resolve the luminal (Lum; CD24<sup>+</sup>CD29<sup>low</sup>) and myoepithelial (Myo; CD24<sup>+</sup>CD29<sup>high</sup>) populations. FITC (GFP) fluorescence was assessed in both subpopulations and was found exclusively in the luminal fraction at a constant frequency of  $0.4 \pm 0.03\%$ . (B) qRT-PCR showing endogenous Notch3 expression in GFP<sup>+</sup> and GFP<sup>-</sup> luminal sorted cells after 24-h 4-OHT induction. Expression in myoepithelial cells was undetectable. Error bars represent the SDs of at least three independent experiments. (C–F) Representative sections from Notch3-CreERT2<sup>SAT</sup>/R26<sup>mTmG</sup> mice induced with 4-OHT 24 h before analysis. (C and D) Immunolabeling of a mammary duct with an anti-Bmi1 antibody, showing strong nuclear staining in some luminal cells, including GFP<sup>+</sup> Notch3-expressing cells. D is a magnification of the squared areas. (E) Confocal image of a representative duct after whole-mount digestion. Blue delineates nonrecombined mammary epithelial cells expressing membrane-bound Tomato (Tom) fluorescence. (E) Confocal image of cellular protrusions extended by GFP<sup>+</sup> cells that cross the basal layer, marked by smooth muscle actin (SMA), and get in close proximity with the basement membrane, marked by Collagen IV (ColIV). Bars: (C) 20 μm; (E) 25 μm; (D and F) 10 μm.

### Lineage tracing starting at 3 weeks of age

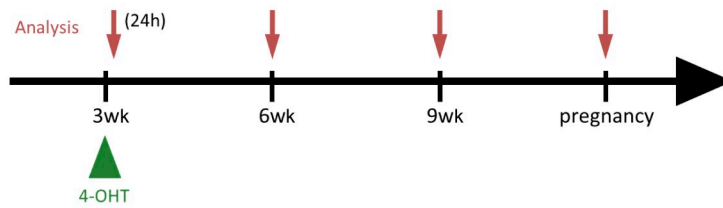

### Lineage tracing starting at 6 weeks of age

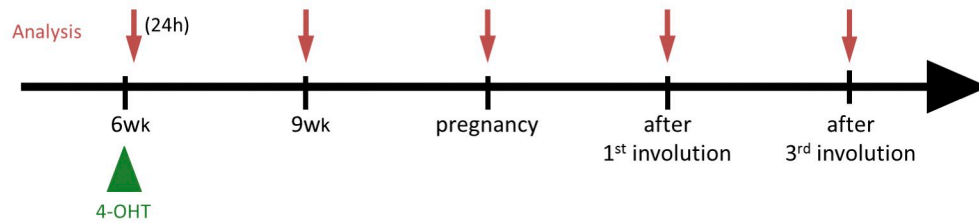

### Lineage tracing starting at 9 weeks of age

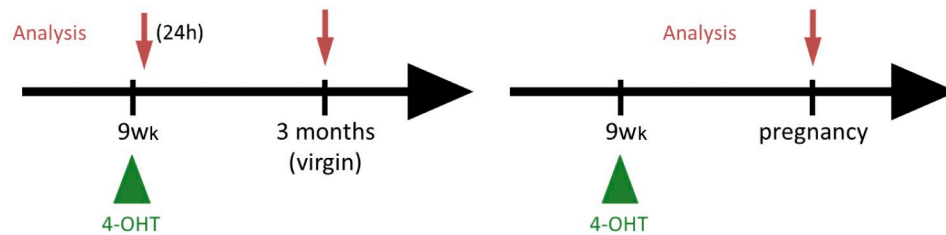

### Analysis of clonal expansion

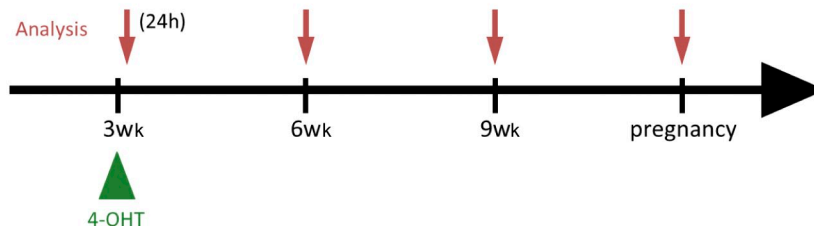

Figure S2. **Timeline of induction and chase time points for lineage-tracing experiments.** Schematic representations of the time of induction and time of analysis of mice performed to study the lineages produced in vivo by Notch3-expressing cells and their clonal expansion. At least three mice were analyzed for each time point.

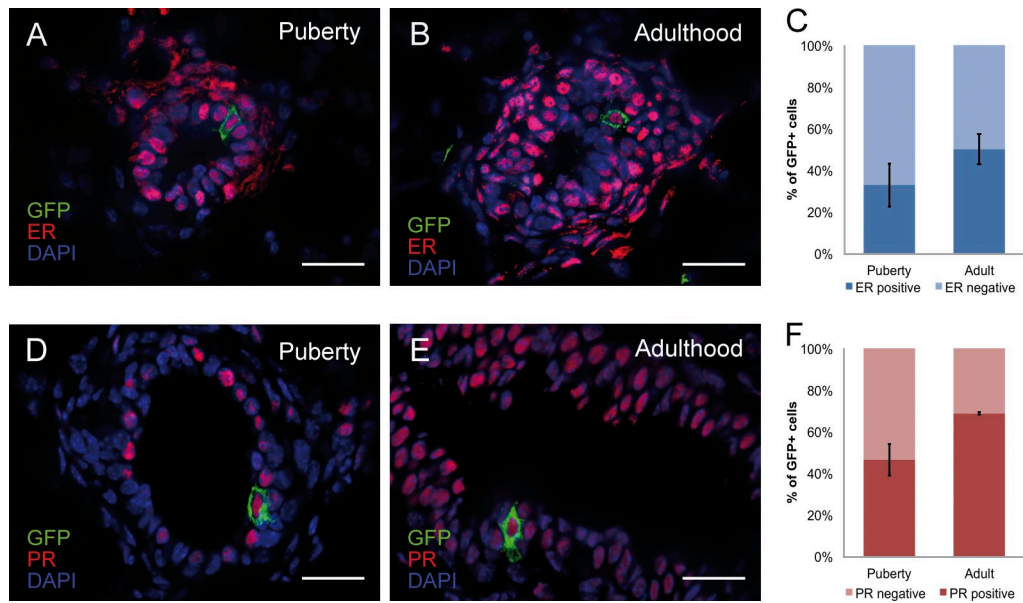

Figure S3. **Analysis of ER and PR expression in GFP<sup>+</sup> cells.** (A, B, D, and E) Representative images of mammary gland sections from Notch3-CreERT2<sup>SAT</sup>/R26<sup>mTmG</sup> mice induced with 4-OHT at puberty or adulthood, as indicated, and analyzed 24 h later. GFP-labeled cells (A, B, D, and E) are both positive and negative for estrogen receptor  $\alpha$  (ER- $\alpha$ ; A and B) and progesterone receptor (PR; D and E) immunostaining. (C and F) No statistically significant difference was observed in the percentage of GFP<sup>+</sup> cells that was either positive or negative for these hormone receptors (ER- $\alpha$  in C and PR in F). Error bars represent the SDs of at least three independent experiments. Bars, 20  $\mu$ m.

Table S1. **Raw data of the number and percentage of clones counted for each experimental condition in triplicates for the analysis of clonal expansion in time**

| Time after induction                              | Single cells   |                |                | Two to four cells |                |                | More than five cells |               |               | Total |     |     |
|---------------------------------------------------|----------------|----------------|----------------|-------------------|----------------|----------------|----------------------|---------------|---------------|-------|-----|-----|
|                                                   | M1             | M2             | M3             | M1                | M2             | M3             | M1                   | M2            | M3            | M1    | M2  | M3  |
| <b>Notch3-CreERT2/R26<sup>mTmG</sup></b>          |                |                |                |                   |                |                |                      |               |               |       |     |     |
| 1 wk                                              | 128/<br>85.33% | 166/<br>75.11% | 256/<br>75.96% | 22/<br>14.67%     | 54/<br>24.43%  | 79/<br>23.44%  | 0/<br>0.00%          | 1/<br>0.45%   | 2/<br>0.59%   | 150   | 221 | 337 |
| 2 wk                                              | 116/<br>49.57% | 51/<br>62.96%  | 190/<br>54.13% | 93/<br>39.74%     | 30/<br>37.04%  | 143/<br>40.74% | 25/<br>10.68%        | 0/<br>0.00%   | 18/<br>5.13%  | 234   | 81  | 351 |
| 3 wk                                              | 78/<br>50.00%  | 178/<br>49.31% | 39/<br>52.70%  | 64/<br>41.03%     | 152/<br>42.11% | 27/<br>36.49%  | 14/<br>8.97%         | 31/<br>8.59%  | 8/1<br>0.81%  | 156   | 361 | 74  |
| 4 wk                                              | 50/<br>32.26   | 42/<br>20.10   | 26/<br>33.33   | 64/<br>41.29      | 127/<br>/60.77 | 38/<br>48.72   | 41/<br>26.45         | 40/<br>19.14  | 14/<br>17.95  | 155   | 209 | 78  |
| <b>Notch3-CreERT2/R26<sup>mTmG</sup>/R26-N3IC</b> |                |                |                |                   |                |                |                      |               |               |       |     |     |
| 4 wk                                              | 87/<br>72.50%  | 174/<br>58.39% | 267/<br>50.66% | 29/<br>24.17%     | 83/<br>27.85%  | 176/<br>33.40% | 4/<br>3.33%          | 41/<br>13.76% | 84/<br>15.94% | 120   | 298 | 527 |

M1, mouse 1; M2, mouse 2; M3, mouse 3.
